# Supplementary material for: Cancer functional states-based molecular subtypes of gastric cancer
Source: Springer Nature journal article supplement (doi:10.1186/s12967-023-03921-1), 2023-02-04
Supplement: MOESM1 [file 23992846]

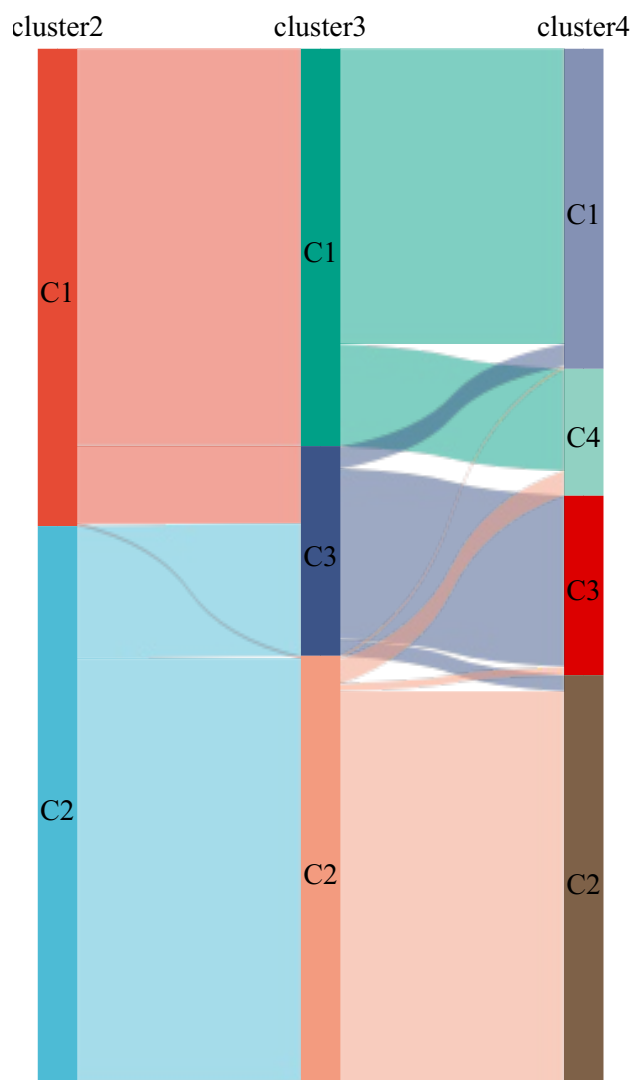

**Figure S1.** The sankey diagram of sample variation with 2, 3 and 4 cluster numbers.

**A**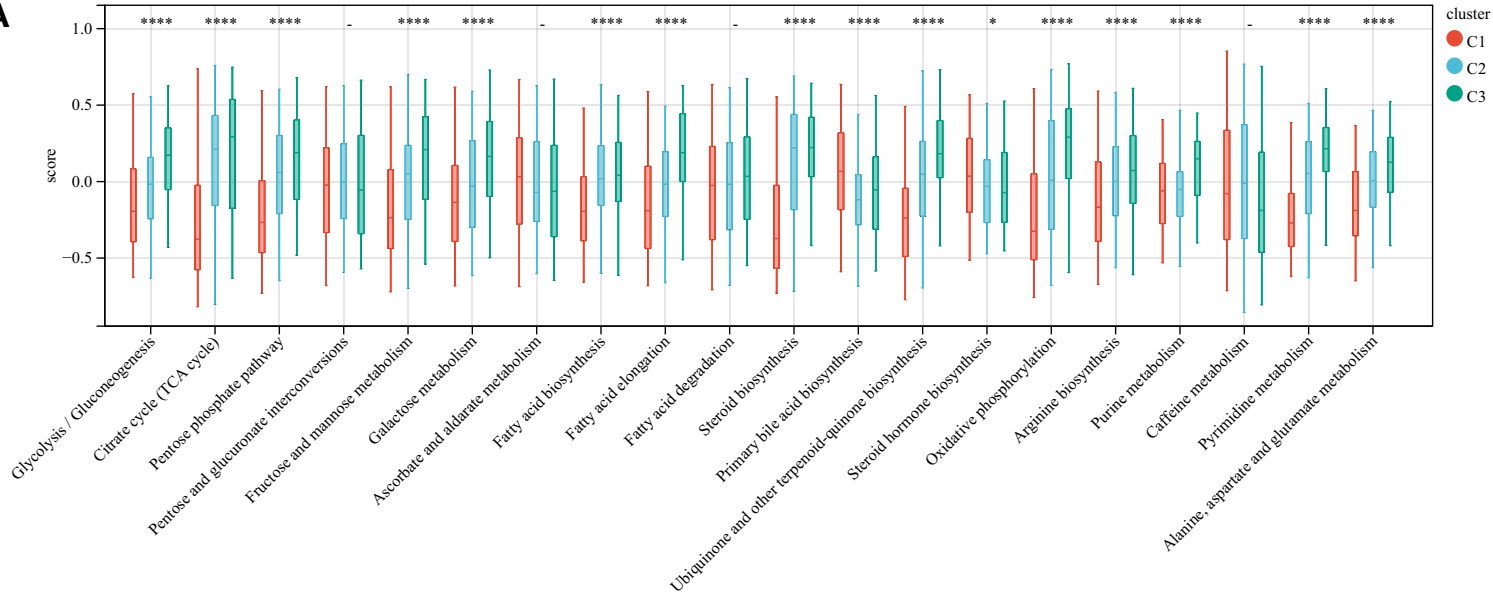**B**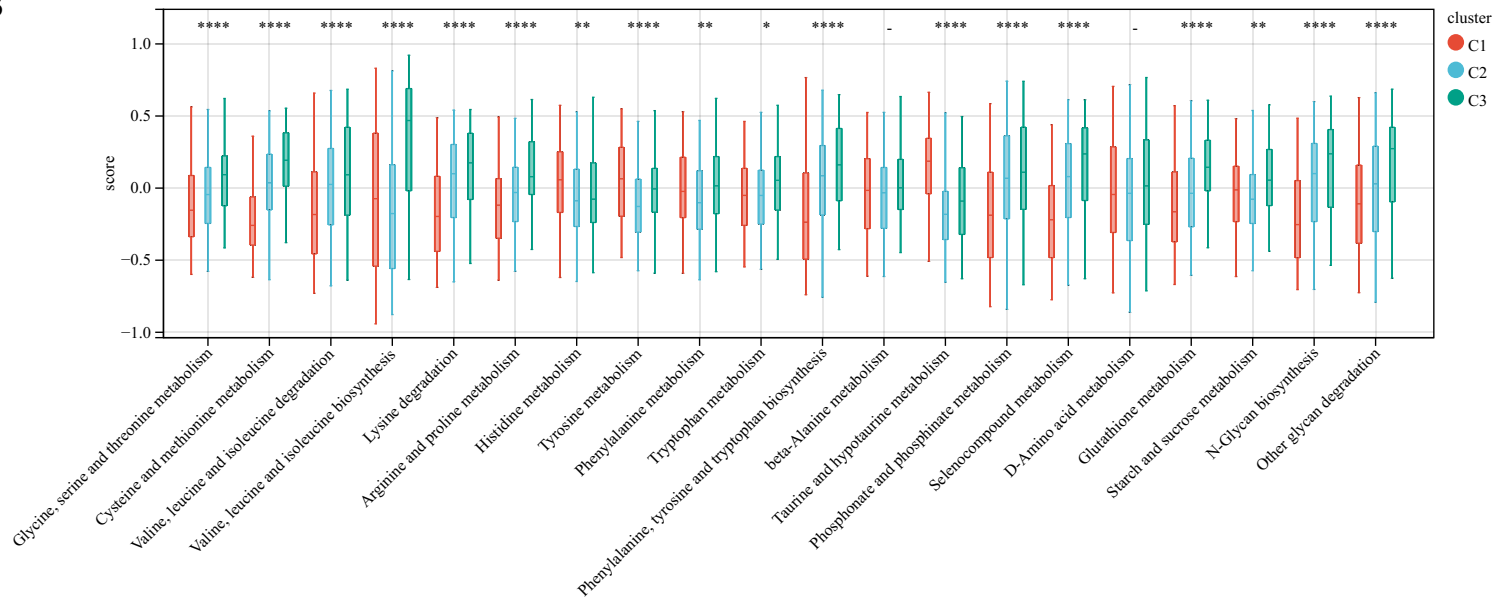**C**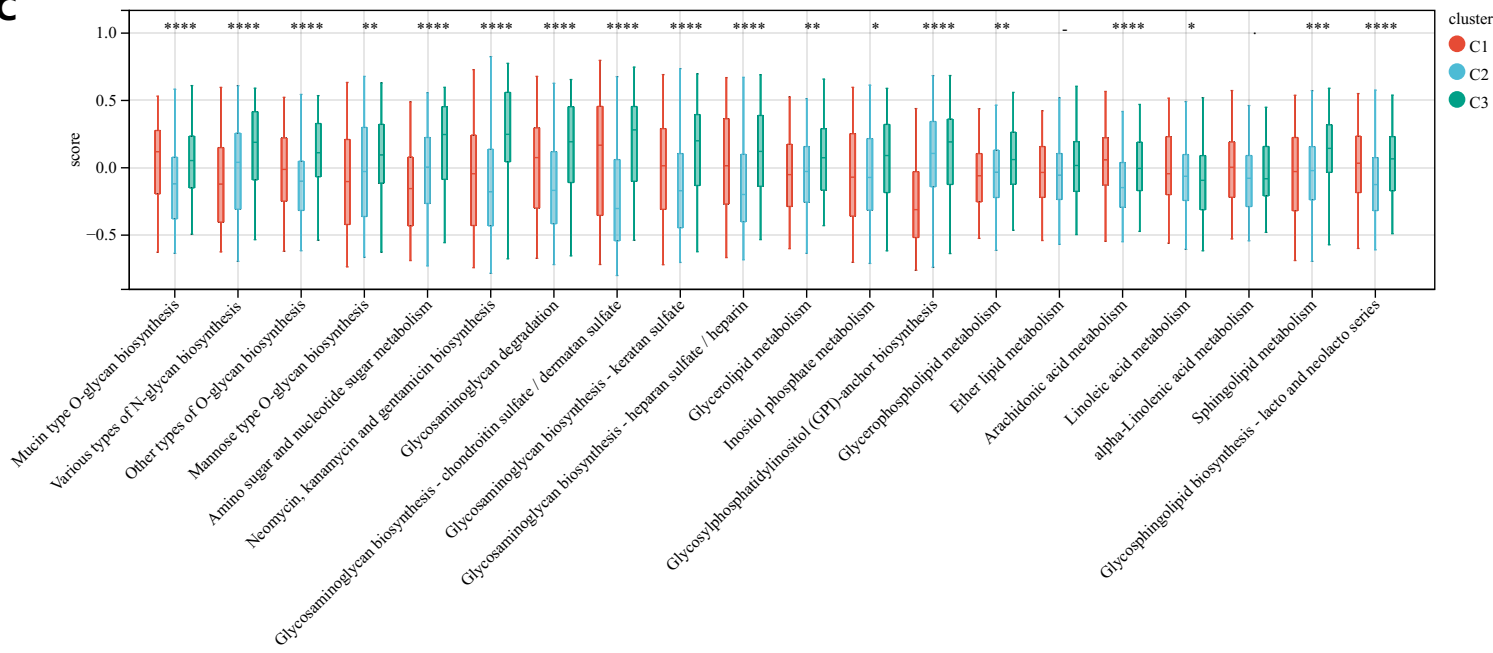

**D**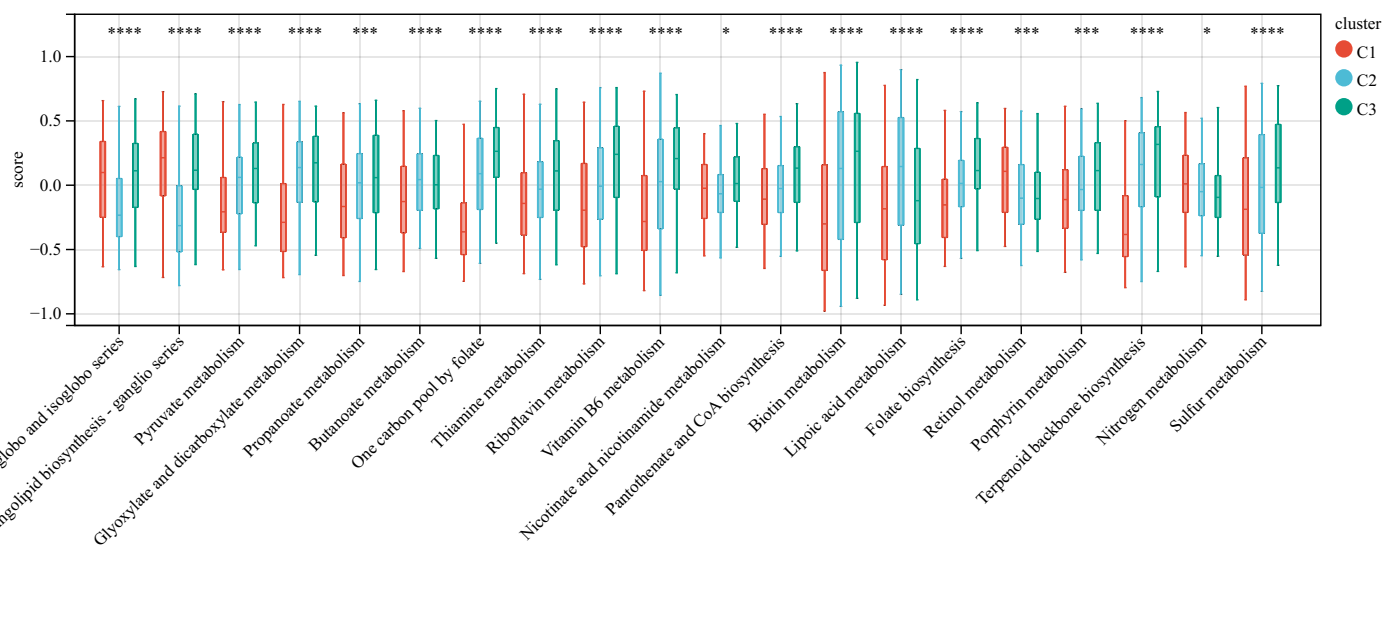**E**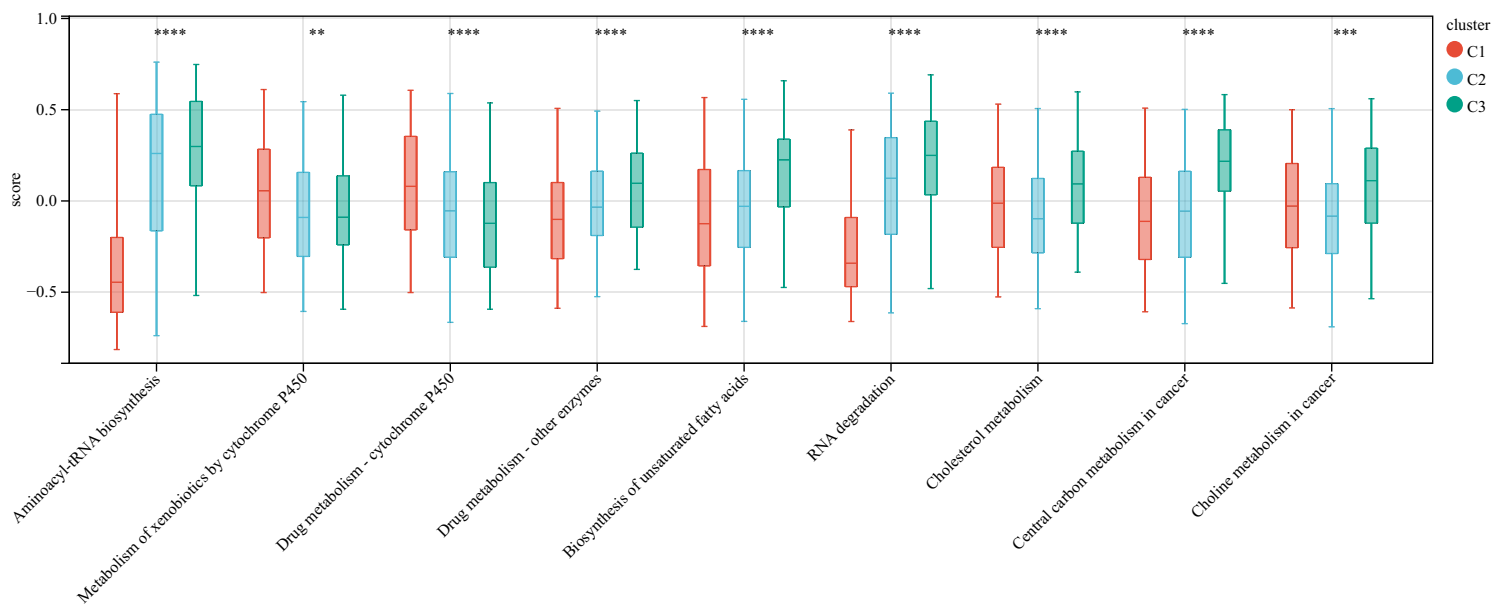

**Figure S2.** Comparison of KEGG pathways among three gastric cancer subtypes.

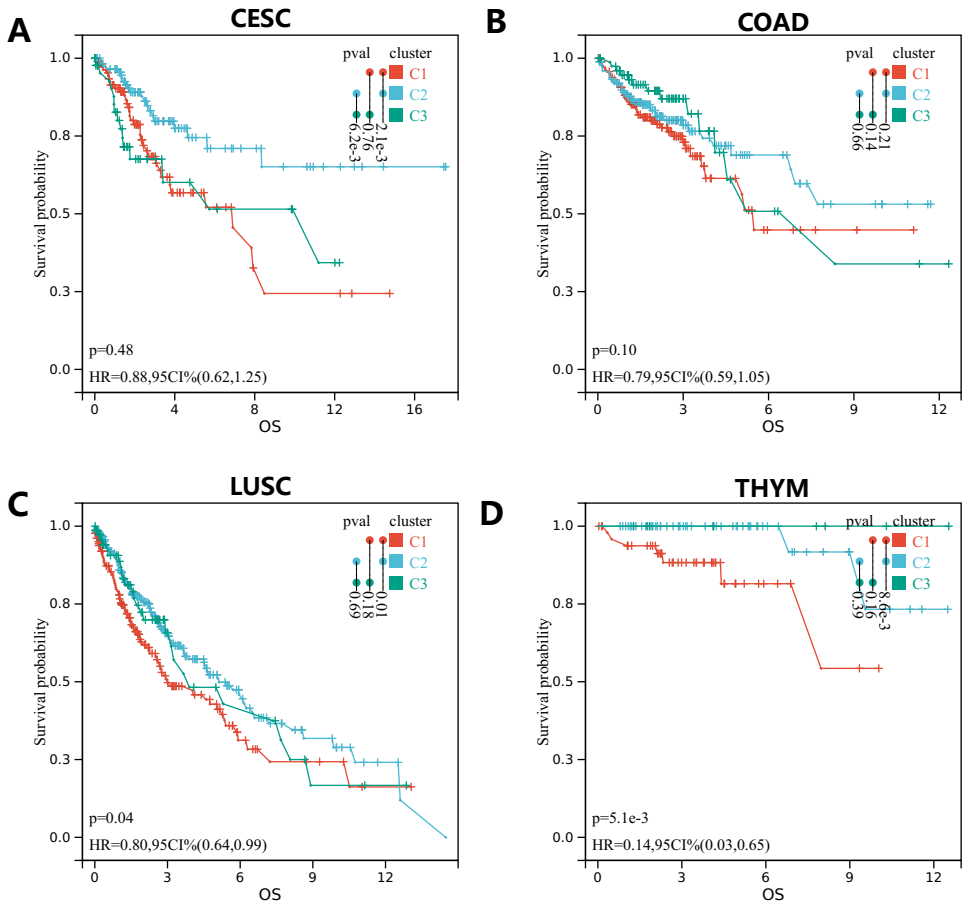

**Figure S3.** Kaplan-Meier curves of OS in CESC, COAD, LUSC and THYM cohort between three subtypes.

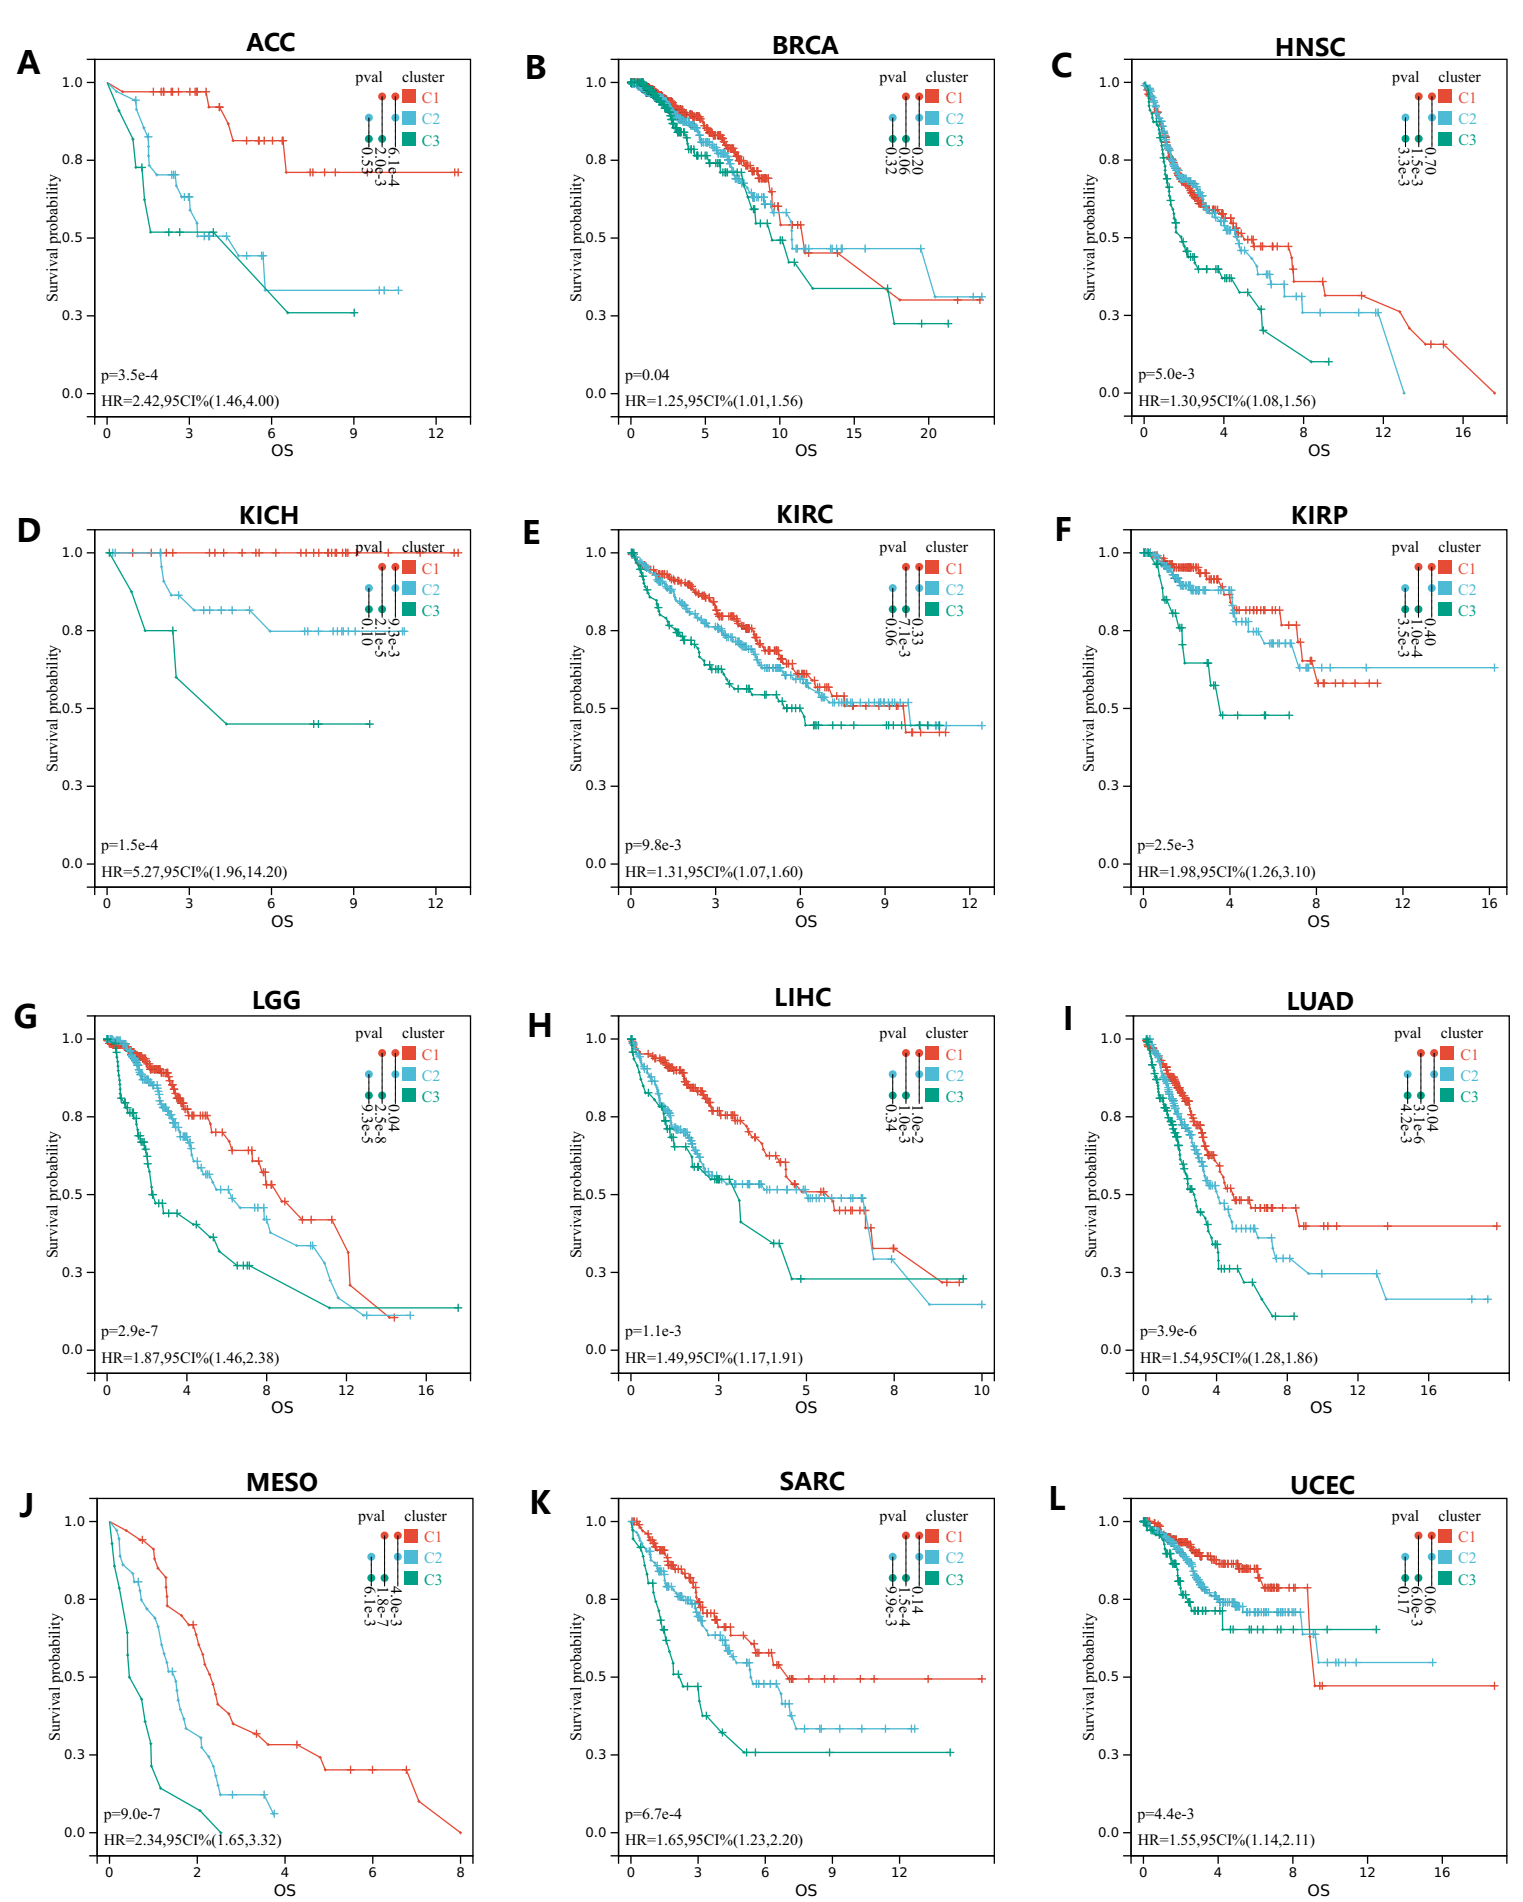

**Figure S4.** Kaplan-Meier curves of OS in ACC, BRCA, HNSC, KICH, KIRC, KIRP, LGG, LIHC, LUAD, MESO, SARC and UCEC cohort between three subtypes.
